# Supplementary material
Source: publisher site journal article supplement (https://www.spandidos-publications.com/1130/downloadSupplementary)
Supplement: Supplementary file 1 [file downloadSupplementary]

## Sheet: Table S1, quality of data
Table SI. Quality control of Next Generation Sequencing data.
No of patients	Raw_data(Mb)	Clean_data(Mb)	Aligned(%)	Initial bases on target	Base covered on target	Coverage of target region	Total effective yield(Mb)	Effective sequence on target(Mb)	Fraction of effective bases on target	Average sequencing depth on target	Fraction of target covered with at least 4X	Fraction of target covered with at least 10X	Fraction of target covered with at least 20X	duplication rate(%)
17121302	745.68	739.41	98.55	132385	132332	1	590.24	492.88	0.835	3723.11	0.998	0.997	0.993	19.1099
17122106	717.66	707.5	98.07	132385	132385	1	589.22	480.05	0.815	3626.19	1	0.996	0.994	14.6448
17122303	399.99	396.11	98.61	132385	132316	0.999	336.57	268.99	0.799	2031.85	0.997	0.989	0.982	13.5252
17122609	552.09	545.62	98.29	132385	132139	0.998	465.62	376.2	0.808	2841.71	0.998	0.997	0.99	12.7057
17123003	721.93	715.23	97.9	132385	131885	0.996	629.5	502.48	0.798	3795.56	0.99	0.984	0.981	10.0867
18010601	393.37	389.06	98.38	132385	132379	1	332.94	259.73	0.78	1961.93	0.997	0.994	0.986	12.924
18011513	795.63	789.11	98.8	132385	132332	1	650.69	545.08	0.838	4117.39	0.998	0.996	0.989	16.3342
18011709	411.51	408.15	98.8	92778	92532	0.997	353.94	210.38	0.594	2267.56	0.997	0.993	0.988	12.0023
18012202	747.21	738.82	97.55	92778	92728	0.999	599.08	311.82	0.521	3360.95	0.999	0.996	0.992	16.7105
18012303	2269.17	2243.5	97.68	132385	132373	1	1311.4	1087.9	0.83	8217.73	1	0.999	0.998	39.7658
18012305	295.41	292.01	98.33	132385	132061	0.998	232.14	183.43	0.79	1385.61	0.995	0.985	0.979	18.652
18012905	453.77	449.59	98.05	92778	92778	1	384.87	227.56	0.591	2452.76	0.999	0.996	0.994	12.5077
18013006	493.01	488.41	97.92	92778	92778	1	427.7	255.8	0.598	2757.1	1	0.998	0.994	10.4051
18013115	870.63	864	98.35	132385	132375	1	741.32	614.38	0.829	4640.84	0.999	0.997	0.994	12.6036
18020114	1106.06	1097.28	98.67	92778	92778	1	899.21	557.8	0.62	6012.19	1	0.999	0.998	16.7233
18020115	1300.15	1290.43	98.77	92778	92719	0.999	1059.07	655.82	0.619	7068.74	0.999	0.998	0.996	16.6695
18020215	719.47	713.42	98.33	132385	132368	1	586.68	471.54	0.804	3561.88	0.999	0.996	0.991	16.3004
18020317	1073.46	1065.37	98.55	92778	92778	1	915.34	582.73	0.637	6280.94	0.999	0.997	0.994	12.5565
18020503	884.62	878.16	98.34	92778	92745	1	766.62	472.23	0.616	5089.88	0.999	0.998	0.994	11.0663
18020514	753.11	747.6	98.24	92778	92778	1	659.36	404.32	0.613	4357.9	1	0.998	0.994	10.062
18021211	560.24	555.53	98.21	132385	132385	1	479.92	398.21	0.83	3007.94	1	0.999	0.994	12.0393
18021313	613.28	608.64	98.4	92778	92778	1	539.28	328.92	0.61	3545.21	1	0.998	0.994	9.8794
18022618	565.39	560.65	97.66	92778	92778	1	475.86	288.64	0.607	3111.04	1	0.999	0.994	13.0501
18022704	584.95	580.75	98.18	92778	92778	1	527.53	325.63	0.617	3509.74	1	0.996	0.995	7.4116
18030304	757.31	752.24	99.01	92778	92776	1	666.16	386.83	0.581	4169.42	0.999	0.996	0.993	10.4509
18030505	647.95	643.45	98.89	92778	92778	1	580.55	334.68	0.576	3607.31	0.999	0.997	0.994	8.6334
18030507	888.72	882.86	98.98	92778	92778	1	776.35	450.8	0.581	4858.89	1	0.998	0.996	11.0498
18030511	614.92	610.92	98.91	132385	132342	1	554.39	444.22	0.801	3355.54	0.999	0.997	0.992	8.1351
18030601	472.85	468.97	97.82	132385	132355	1	423.57	331.11	0.782	2501.12	0.997	0.994	0.985	7.5368
18031015	655.91	651.59	98.39	132385	132371	1	582.66	481.85	0.827	3639.75	0.998	0.995	0.987	9.0474
18031206	667.66	661.19	98.64	92778	92778	1	603.5	334.51	0.554	3605.48	1	0.998	0.994	7.4444
18031310	408.69	405.11	98.17	132385	132203	0.999	362.77	288.64	0.796	2180.31	0.997	0.994	0.986	8.6081
18031410	365.29	362.03	98.54	92778	92778	1	329.62	191.74	0.582	2066.7	1	0.995	0.99	7.3903
18031724	319.14	316.02	98.47	132385	132102	0.998	277.17	206.65	0.746	1560.99	0.993	0.985	0.982	10.7161
18031902	484.95	480.71	97.53	92778	92778	1	426.55	247.88	0.581	2671.72	1	0.996	0.992	8.9303
18032109	574.77	568.66	97.66	92778	92778	1	493.64	287.11	0.582	3094.57	1	1	0.998	10.9508
18032305	834.14	823.04	98.25	92778	92778	1	710.86	419.22	0.59	4518.53	1	0.999	0.996	11.9116
18032406	936.99	926.53	98.59	132385	132385	1	831.65	685.44	0.824	5177.65	1	0.997	0.996	8.7315
18032423	379.85	373.27	97.04	132385	128821	0.973	209.69	151.58	0.723	1145.02	0.954	0.937	0.916	42.6558
18032429	736.75	725.97	97.7	132385	129499	0.978	393.23	293.52	0.746	2217.19	0.972	0.966	0.955	44.3365
18032630	633.11	627.94	97.9	92778	92778	1	553.62	329.2	0.595	3548.25	1	0.995	0.991	9.8306
18040213	522.07	517.5	98.43	92778	92743	1	461.29	263.74	0.572	2842.67	0.997	0.993	0.989	9.2697
18040214	313.55	310.17	97.89	92778	92515	0.997	279.84	153.98	0.55	1659.7	0.996	0.992	0.988	7.6943
18040310	239.55	236.39	97.15	132385	132306	0.999	202.71	148.83	0.734	1124.21	0.993	0.981	0.958	11.5635
18040402	222.06	219.22	97.33	92778	92493	0.997	190.95	104.44	0.547	1125.65	0.993	0.989	0.984	10.5855
18040526	581.36	576.52	98.71	132385	132349	1	525.36	424.47	0.808	3206.34	0.996	0.989	0.983	7.489
18040531	782.44	776.11	98.37	92778	92778	1	694.59	426.13	0.613	4592.98	0.998	0.995	0.99	8.952
18040535	833.56	826.59	97.99	92778	92778	1	678.03	405.33	0.598	4368.83	1	0.998	0.992	16.2019
18040602	598.33	592.97	98.02	92778	92778	1	510.52	297.47	0.583	3206.21	0.999	0.997	0.992	12.0406
18040608	497.29	492.98	97.74	92778	92778	1	426.73	243.8	0.571	2627.73	0.999	0.993	0.989	11.3503
18040613	528.26	523.96	98.04	92778	92768	1	458.09	265.08	0.579	2857.09	0.998	0.995	0.989	10.7145
18040902	255.95	253.19	97.26	92778	92532	0.997	220.19	124.85	0.567	1345.69	0.996	0.989	0.986	10.5924
18041208	604.25	597.83	98.51	92778	92778	1	540.75	305.2	0.564	3289.61	1	0.997	0.995	7.9839
18041427	361.49	358.17	98.78	92778	92774	1	325.43	181.23	0.557	1953.32	0.996	0.992	0.988	7.7418
18041838	637.45	631.78	98.93	92778	92760	1	573.98	325.63	0.567	3509.79	0.999	0.997	0.994	7.9536
18041906	642.14	636.53	98.93	92778	92778	1	569.13	314.37	0.552	3388.36	0.999	0.996	0.994	9.468
18042027	447.23	443.13	97.88	92778	92778	1	402.31	233.7	0.581	2518.97	0.998	0.992	0.989	7.1525
18042126	548.39	544.02	98.43	132385	132266	0.999	503.49	402.51	0.799	3040.47	0.997	0.994	0.985	5.8633
18042130	700.91	695.73	98.6	132385	132385	1	636.9	511.28	0.803	3862.06	0.997	0.993	0.984	7.0385
18042302	320.71	317.7	98.32	92778	92739	1	293.32	169.92	0.579	1831.49	0.997	0.995	0.989	5.8899
18042305	535.51	530.67	98.49	92778	92749	1	491.99	279.25	0.568	3009.92	0.997	0.996	0.994	5.702
18042323	572.72	568.16	98.69	92778	92747	1	517.96	299.96	0.579	3233.1	0.999	0.996	0.991	7.5081
18042722	815.8	805.85	98.39	92778	92778	1	686.62	379.9	0.553	4094.72	1	0.999	0.994	13.3138
18042813	444.86	438.56	98.05	92778	92778	1	358.69	198.59	0.554	2140.53	0.999	0.997	0.993	16.3064
18042830	242.6	235.05	95.72	92778	92728	0.999	127.11	64.77	0.51	698.09	0.997	0.995	0.992	42.239
18042906	433.9	428.02	98.41	92778	92691	0.999	377.37	211.43	0.56	2278.92	0.997	0.995	0.991	9.9672
18050418	612.33	605.94	97.96	92778	92778	1	531.72	325.76	0.613	3511.21	1	0.999	0.997	10.2085
18050508	74.64	71.95	94.65	92778	92291	0.995	55.67	30.39	0.546	327.6	0.984	0.975	0.957	19.4907
18050707	827.38	816.45	98.61	92778	92778	1	656.42	394.53	0.601	4252.45	1	0.998	0.994	18.2439
18050730	583.86	576.83	98.84	92778	92778	1	510.43	312.39	0.612	3367.04	1	1	0.996	10.2986
18051017	427.19	421.96	97.73	132385	132385	1	369.91	292.5	0.791	2209.47	0.999	0.997	0.993	10.205
18051214	378.02	374.35	98.63	92778	92778	1	350.29	209.51	0.598	2258.2	1	0.996	0.992	5.0147
18051404	420.79	415.47	97.56	92778	92778	1	364.11	211.56	0.581	2280.28	0.999	0.994	0.99	11.3896
18051504	318.11	313.96	98.01	92778	92778	1	269.56	156.45	0.58	1686.29	0.999	0.993	0.992	12.1078
18051602	827.14	816.13	97.23	92778	92778	1	711.77	424.44	0.596	4574.78	1	0.998	0.993	10.1676
18051701	666.85	657.7	97.14	92778	92778	1	567.43	338.81	0.597	3651.84	1	0.999	0.993	10.9814
18051724	579.53	571.26	96.88	92778	92778	1	499.8	291.78	0.584	3144.97	0.999	0.996	0.993	9.5688
18051814	857.11	848.65	98.05	132385	132385	1	733.21	619.87	0.845	4682.35	1	0.999	0.997	11.7464
18052214	685.68	677.64	97.99	132385	132372	1	603.79	511.66	0.847	3864.94	1	0.998	0.995	8.8667
18052328	1095.97	1081.82	97.49	92778	92778	1	845.23	502.36	0.594	5414.69	0.999	0.998	0.996	20.1826
18052518	980.44	968.14	98.08	92778	92778	1	764.51	433.07	0.566	4667.86	0.999	0.998	0.996	19.1374
18052521	748.95	740.34	98.49	92778	92778	1	637.02	377.54	0.593	4069.33	0.999	0.997	0.994	12.4864
18052526	986.25	976.29	98.29	92778	92778	1	829.82	506.76	0.611	5462.05	1	0.999	0.998	13.4463
18052530	934.35	924.91	98.16	92778	92778	1	735.68	447.39	0.608	4822.12	1	0.999	0.996	18.7593
18052605	524.31	518.98	98.09	92778	92778	1	458.06	282.18	0.616	3041.48	1	0.998	0.993	9.8533
18052624	815.17	807.42	98.4	92778	92778	1	719.15	443.42	0.617	4779.36	1	0.999	0.997	9.3705
18052625	1238.67	1223.66	96.61	92778	92778	1	945.56	570.71	0.604	6151.38	1	0.999	0.998	20.1047
18052802	823.24	814.3	97.06	92778	92778	1	683.15	420.7	0.616	4534.47	1	0.997	0.995	13.5409
18060504	344.89	338.62	95.78	132385	132187	0.999	282.13	208.15	0.738	1572.32	0.995	0.987	0.978	12.2382
18060513	393.49	387.33	96.41	92778	92763	1	340.48	189.49	0.557	2042.45	0.999	0.991	0.983	8.1398
18060717	415.81	411.26	98.42	92778	92778	1	368.41	223.39	0.606	2407.75	1	0.999	0.997	8.73
18060732	318.99	315.43	98.48	132385	132375	1	291.87	245.36	0.841	1853.4	0.999	0.996	0.991	5.7733
18060821	829.99	822.06	98.38	92778	92778	1	693.22	421.33	0.608	4541.31	1	0.999	0.998	14.2207
18061109	867.28	856.69	97.73	92778	92778	1	660.46	391	0.592	4214.39	1	0.999	0.997	20.9263
18061120	666.5	658.38	98.01	92778	92778	1	581.47	349.62	0.601	3768.37	0.999	0.997	0.995	9.7681
18061121	884.44	874.2	97.89	92778	92778	1	714.53	425.78	0.596	4589.27	1	1	0.998	16.3143
18062314	812.89	804.02	97.57	92778	92778	1	698.9	414.79	0.593	4470.81	1	1	0.998	10.8275
18062317	486.43	480.99	97.36	132385	132385	1	427.75	357.56	0.836	2700.89	0.999	0.998	0.994	8.5571
18062543	1150.65	1142.15	98.74	92778	92778	1	925.96	554.65	0.599	5978.26	1	0.999	0.997	17.7678
18062601	983.41	973.7	97.45	132385	132385	1	648.64	519.94	0.802	3927.49	1	0.999	0.998	31.3142
18070609	925.23	915.73	98.06	92778	92777	1	748.71	444.53	0.594	4791.28	1	0.999	0.997	16.5891
18070713	805.24	798.4	98.55	92778	92778	1	715.15	437.14	0.611	4711.71	1	0.999	0.998	8.9579
18070901	891.94	885.86	98.96	92778	92778	1	770.88	458.48	0.595	4941.66	1	0.999	0.998	11.9121
18070904	694.33	689.54	98.95	92778	92778	1	591.48	362.97	0.614	3912.19	1	0.999	0.996	13.106
18070908	715.56	710.9	99.08	92778	92778	1	638.9	387.92	0.607	4181.13	1	0.999	0.997	9.1169
18070919	771.19	765.69	99	92778	92745	1	686.76	412.23	0.6	4443.18	0.999	0.998	0.996	9.1961
18071002	1048.28	1040.32	98.73	92778	92778	1	902.05	541.25	0.6	5833.79	1	1	0.998	12.068
18071006	918.34	911.88	98.8	92778	92778	1	773.72	478.42	0.618	5156.64	1	1	0.998	13.9787
Mb, megabase.
